# Supplementary material for: Preparative purification of corilagin from Phyllanthus by combining ionic liquid extraction, prep-HPLC, and precipitation
Source: Royal Society of Chemistry journal article supplement (doi:10.1039/d0ay00860e), 2020-01-01
Supplement: d0ay00860e1.pdf [file d0ay00860e1.pdf]

Article

## Preparative purification of corilagin from *Phyllanthus* by combining ionic liquid extraction, prep-HPLC, and precipitation

Xiaodong Hou, Zitao Cheng, Jiao Wang\*

### Supporting Information

#### Summary

This supplementary material includes additional results and information as described in the text of the main article. Including:

#### Contents

Page S-2: Figure S1. The standard curve of corilagin established using UPLC.

Page S-3: Figure S2. The orthogonal design for corilagin extraction content using [BMIm]Br with observed responses.

Page S-4: Figure S3. HRESI-MS spectrum of corilagin.

Page S-5: Figure S4. <sup>1</sup>H NMR of corilagin.

Page S-6: Figure S5. <sup>13</sup>C NMR of corilagin.

---

\* Corresponding author

Tobacco Research Institute, Chinese Academy of Agricultural Sciences, Qingdao, Shandong 266101, China

E-mail: [wangj362@nenu.edu.cn](mailto:wangj362@nenu.edu.cn)
